# Supplementary material for: Robotic versus conventional sternotomy mitral valve surgery: a systematic review and meta-analysis
Source: PubMed Central journal article supplement — Ann Cardiothorac Surg. 2022 Sep;11(5):490–503. doi: 10.21037/acs-2022-rmvs-21 (PMC9551372; doi:10.21037/acs-2022-rmvs-21), 2022-09
Supplement: acs-11-05-490-supplementary.pdf [file acs-11-05-490-supplementary.pdf]

**Table S1** Summary of the underlying mitral valve pathology

| Primary author            | Approach   | N     | Myxomatous degeneration (%) | Ischaemic (%) | Infection (%) | Rheumatic (%) | Functional (%) | Other (%) |
|---------------------------|------------|-------|-----------------------------|---------------|---------------|---------------|----------------|-----------|
| Chemtob, 2020             | Sternotomy | 395   | 100.0                       | 0.0           | 0.0           | 0.0           | 0.0            | 0.0       |
|                           | Robotic    | 605   | 100.0                       | 0.0           | 0.0           | 0.0           | 0.0            | 0.0       |
| Coyan, 2018               | Sternotomy | 91    | NR                          | NR            | 11.0          | NR            | NR             | NR        |
|                           | Robotic    | 91    | NR                          | NR            | 7.7           | NR            | NR             | NR        |
| Folliguet, 2006           | Sternotomy | 25    | 100.0                       | 0.0           | 0.0           | 0.0           | 0.0            | 0.0       |
|                           | Robotic    | 25    | 100.0                       | 0.0           | 0.0           | 0.0           | 0.0            | 0.0       |
| Hawkins, 2018 (unmatched) | Sternotomy | 1,352 | 45.3                        | 1.6           | 14.9          | 11.8          | NR             | 14.3      |
|                           | Robotic    | 372   | 80.9                        | 0.8           | 5.7           | 7.0           | NR             | 4.8       |
| Hawkins, 2018 (PSM)       | Sternotomy | 314   | 78.0                        | 1.0           | 6.4           | 7.3           | NR             | NR        |
|                           | Robotic    | 314   | 79.0                        | 1.0           | 6.4           | 7.0           | NR             | NR        |
| Kam, 2010                 | Sternotomy | 40    | 100.0                       | 0.0           | 0.0           | 0.0           | 0.0            | 0.0       |
|                           | Robotic    | 107   | 100.0                       | 0.0           | 0.0           | 0.0           | 0.0            | 0.0       |
| Kesävuori, 2018           | Sternotomy | 142   | 100.0                       | 0.0           | 0.0           | 0.0           | 0.0            | 0.0       |
|                           | Robotic    | 142   | 100.0                       | 0.0           | 0.0           | 0.0           | 0.0            | 0.0       |
| Mihaljevic, 2011          | Sternotomy | 114   | 100.0                       | 0.0           | 0.0           | 0.0           | 0.0            | 0.0       |
|                           | Robotic    | 261   | 100.0                       | 0.0           | 0.0           | 0.0           | 0.0            | 0.0       |
| Seo, 2019                 | Sternotomy | 259   | NR                          | NR            | NR            | NR            | NR             | NR        |
|                           | Robotic    | 175   | NR                          | NR            | NR            | NR            | NR             | NR        |
| Sicim, 2021               | Sternotomy | 66    | 100.0                       | 0.0           | 0.0           | 0.0           | 0.0            | 0.0       |
|                           | Robotic    | 64    | 100.0                       | 0.0           | 0.0           | 0.0           | 0.0            | 0.0       |
| Stevens, 2012             | Sternotomy | 377   | 43.8                        | 6.4           | 8.5           | 14.9          | 6.1            | 20.4      |
|                           | Robotic    | 447   | 80.0                        | 0.9           | 4.5           | 3.6           | 8.5            | 2.5       |
| Suri, 2011                | Sternotomy | 95    | 100.0                       | 0.0           | 0.0           | 0.0           | 0.0            | 0.0       |
|                           | Robotic    | 95    | 100.0                       | 0.0           | 0.0           | 0.0           | 0.0            | 0.0       |
| Wang, 2018                | Sternotomy | 503   | NR                          | NR            | NR            | NR            | NR             | NR        |
|                           | Robotic    | 503   | NR                          | NR            | NR            | NR            | NR             | NR        |
| Woo, 2006                 | Sternotomy | 39    | NR                          | NR            | NR            | NR            | NR             | NR        |
|                           | Robotic    | 25    | NR                          | NR            | NR            | NR            | NR             | NR        |
| Zhao, 2020                | Sternotomy | 47    | 17.0                        | 0.0           | 4.3           | 76.6          | 0.0            | 2.1       |
|                           | Robotic    | 47    | 12.8                        | 0.0           | 4.3           | 76.6          | 0.0            | 6.4       |

PSM, propensity score matched cohort; N, number of patients.

**Table S2** Pooled baseline characteristics for matched patients only

| Variable                                   | Robotic matched (n=1,323) | Sternotomy matched (n=1,323) |
|--------------------------------------------|---------------------------|------------------------------|
| Age (years), mean                          | 68.4                      | 68.6                         |
| Male, %                                    | 65.0                      | 65.3                         |
| BMI (kg/m <sup>2</sup> ), mean             | 26.2                      | 26.4                         |
| Hypertension, %                            | 46.5                      | 45.2                         |
| Diabetes, %                                | 6.8                       | 7.1                          |
| Cerebrovascular disease, %                 | 3.3                       | 3.6                          |
| Respiratory disease, %                     | 4.1                       | 5.4                          |
| LVEF, mean                                 | 60.1                      | 60.0                         |
| Cardiac arrhythmia, %                      | 17.8                      | 19.3                         |
| NYHA III/IV, %                             | 26.4                      | 29.5                         |
| Valve pathology—myxomatous degeneration, % | 87.4                      | 88.0                         |

BMI, body mass index; LVEF, left ventricular ejection fraction; NYHA, New York Heart Association.

| Table S3 Procedural details |                                                                                                                                                              |                                                                                            |                              |                                                |                                                |                   |                |                                                                                                                                       |                                                                                                                                            |                                                                                                          |                                      |
|-----------------------------|--------------------------------------------------------------------------------------------------------------------------------------------------------------|--------------------------------------------------------------------------------------------|------------------------------|------------------------------------------------|------------------------------------------------|-------------------|----------------|---------------------------------------------------------------------------------------------------------------------------------------|--------------------------------------------------------------------------------------------------------------------------------------------|----------------------------------------------------------------------------------------------------------|--------------------------------------|
| Primary Author              | Robotic access method                                                                                                                                        | Robotic XC method                                                                          | Cardioplegia strategy        | Replacement—sternotomy                         | Replacement—robotic                            | Repair—sternotomy | Repair—robotic | Repair details                                                                                                                        | Concomitant surgery—robotic                                                                                                                | Concomitant surgery—sternotomy                                                                           | Conversion to sternotomy/thoracotomy |
| Chemtob                     | Access ports placed through the right chest, including a 4-cm mini-thoracotomy working port                                                                  | Transthoracic aortic cross-clamp                                                           | Antegrade                    | 4 (1%), 2 were failed repairs                  | 0 (0%)                                         | 391 (99%)         | 605 (100%)     | Resectional techniques, artificial chordae, or both along with flexible annuloplasty band                                             | 0 (0.0%)                                                                                                                                   | 0 (0.0%)                                                                                                 | 0 (0%)                               |
| Coyan                       | 4-cm right lateral mini-thoracotomy and access ports                                                                                                         | Transthoracic aortic cross-clamp                                                           | NR                           | 17 (18.7%)                                     | 13 (14.3%)                                     | 74 (81.3%)        | 78 (85.7%)     | NR                                                                                                                                    | TVR/r, closure of ASD, or surgical ablation procedures                                                                                     | TVR/r, closure of ASD, or surgical ablation procedures                                                   | 0 (0%)                               |
| Folliguet                   | Two ports and a 4–5 cm intercostals lateral incision in the right chest                                                                                      | Transthoracic aortic cross-clamp                                                           | Antegrade                    | 0 (0%)                                         | 0 (0%)                                         | 25 (100%)         | 25 (100%)      | Posterior leaflet resection and open band or a closed annuloplasty ring                                                               | NR                                                                                                                                         | NR                                                                                                       | 1 (4%)—thoracotomy                   |
| Hawkins—PSM group           | NR                                                                                                                                                           | NR                                                                                         | NR                           | 77 (24.5%)                                     | 30 (9.5%)                                      | 237 (75.5%)       | 284 (90.5%)    | Leaflet resection and/or neochords and ring annuloplasty                                                                              | LAAL 18 (5.7%)                                                                                                                             | LAAL 46 (14.7%)                                                                                          | 0 (0%)                               |
| Hawkins—larger cohort       | NR                                                                                                                                                           | NR                                                                                         | NR                           | 655 (48.4%)                                    | 36 (9.7%)                                      | 697 (51.6%)       | 336 (90.3%)    | Leaflet resection and/or neochords and ring annuloplasty                                                                              | LAAL 21 (5.7%)                                                                                                                             | LAAL 19 (3.3%)                                                                                           | 0 (0%)                               |
| Kam                         | Right thoracotomy (<4 cm) and a number of smaller ports                                                                                                      | NR                                                                                         | NR                           | 0 (0%)                                         | 0 (0%)                                         | 40 (100%)         | 107 (100%)     | NR                                                                                                                                    | 0 (0.0%)                                                                                                                                   | 0 (0.0%)                                                                                                 | NR                                   |
| Kesävuori                   | Camera port was placed near the mammilla (4th intercostal space), service port was placed laterally same or adjacent intercostal space, 3 other access ports | Endoaortic balloon primarily, but transthoracic aortic cross-clamp used in some operations | Antegrade and retrograde     | 3 (2.1%)                                       | 2 (1.4%)                                       | 139 (97.9%)       | 140 (98.6%)    | Neochord implantation and/or leaflet resection and/or commissuroplasty                                                                | AF ablation 35 (24.6%), TVr 6 (4.2%), PFO closure 14 (9.9%), LAAL 32 (22.5%), myxoma excision 1 (0.7%), pericardial cyst excision 1 (0.7%) | AF ablation 30 (21.1%), TVr 17 (12.0%), PFO closure 7 (4.9%), LAAL 26 (18.3%), thymoma excision 1 (0.7%) | 14 (9.9%)                            |
| Mihaljevic                  | Mini-thoracotomy fourth intercostal space in the mid-axillary line and other access ports                                                                    | Endoaortic balloon or transthoracic aortic clamp                                           | Antegrade and retrograde     | 1 (0.9%)                                       | 0 (0%)                                         | 113 (99.1%)       | 261 (100%)     | Annuloplasty and leaflet resection or chordal procedure or edge-to-edge repair                                                        | ASD or PFO closure 34 (13%), left-sided ablative lesions for AF 22 (8.4%)                                                                  | ASD or PFO closure 7 (6.1%), Left-sided ablative lesions for AF 31 (27%)                                 | 24 (9.1%)                            |
| Seo                         | NR                                                                                                                                                           | NR                                                                                         | NR                           | 0 (0%)                                         | 0 (0%)                                         | 259 (100%)        | 175 (100%)     | NR                                                                                                                                    | 0 (0.0%)                                                                                                                                   | 0 (0.0%)                                                                                                 | 4 (2.3%)                             |
| Sicim                       | 4-cm anterolateral thoracotomy incision                                                                                                                      | Transthoracic aortic cross-clamp                                                           | Antegrade                    | 66 (100%)                                      | 64 (100%)                                      | 0 (0%)            | 0 (0%)         | NR                                                                                                                                    | 0 (0%)                                                                                                                                     | 0 (0%)                                                                                                   | NR                                   |
| Stevens                     | 3- to 4-cm working port in the right inframammary fold through the fourth intercostal space                                                                  | Transthoracic aortic cross-clamp primarily, endoaortic balloon occlusion used infrequently | Antegrade and/or retrograde  | 169 (44.8%)                                    | 5 (1.1%)                                       | 208 (55.2%)       | 442 (98.9%)    | Techniques involving combination or isolated annuloplasty, leaflet resection and chordal procedure                                    | AF ablation 84 (19%)                                                                                                                       | AF ablation 22 (6%)                                                                                      | NR                                   |
| Suri                        | 2- to 3-cm working port lateral to the camera port in the right 4th intercostal space                                                                        | Transthoracic aortic cross-clamp                                                           | Antegrade                    | 0 (0%)                                         | 0 (0%)                                         | 95 (100%)         | 95 (100%)      | Triangular resection for posterior leaflet disease, neochords for anterior leaflet prolapse and all repairs partial annuloplasty band | ASD/PFO closure or Maze/modified Maze procedures                                                                                           | ASD/PFO closure or Maze/modified Maze procedures                                                         | 0 (0%)                               |
| Wang                        | NR                                                                                                                                                           | Endoaortic balloon or transthoracic aortic clamp*                                          | Antegrade and/or retrograde* | 49 (9.7%)                                      | 8 (1.6%)                                       | 454 (90.3%)       | 495 (98.4%)    | Combination or isolated annuloplasty, leaflet resection, sliding plasty, neochords, edge-to-edge repair and chordal procedure         | PFO or ASD repair                                                                                                                          | PFO or ASD repair                                                                                        | NR                                   |
| Woo                         | Right chest was entered in the fourth intercostals space and other port access                                                                               | Endoaortic balloon or transthoracic aortic clamp                                           | Antegrade and retrograde     | 16 (41%)                                       | 8 (32%)                                        | 23 (59%)          | 17 (68%)       | Ring annuloplasty and indicated leaflet, chordal, and annular reconstruction                                                          | 0 (0.0%)                                                                                                                                   | 0 (0.0%)                                                                                                 | NR                                   |
| Zhao                        | NR                                                                                                                                                           | NR                                                                                         | NR                           | Mechanical 33 (70.2%)/bioprosthetic 14 (29.8%) | Mechanical 35 (84.5%)/bioprosthetic 12 (25.5%) | 0 (0%)            | 0 (0%)         | NR                                                                                                                                    | NR                                                                                                                                         | NR                                                                                                       | NR                                   |

\*, one operation (robotic) performed beating heart and four (3 robotic and 1 sternotomy) performed utilising fibrillatory arrest. NR, not reported; TVR/r, tricuspid valve replacement/repair; ASD, atrial septal defect; PFO, patent foramen ovale; LAAL, left atrial appendage ligation; AF, atrial fibrillation.

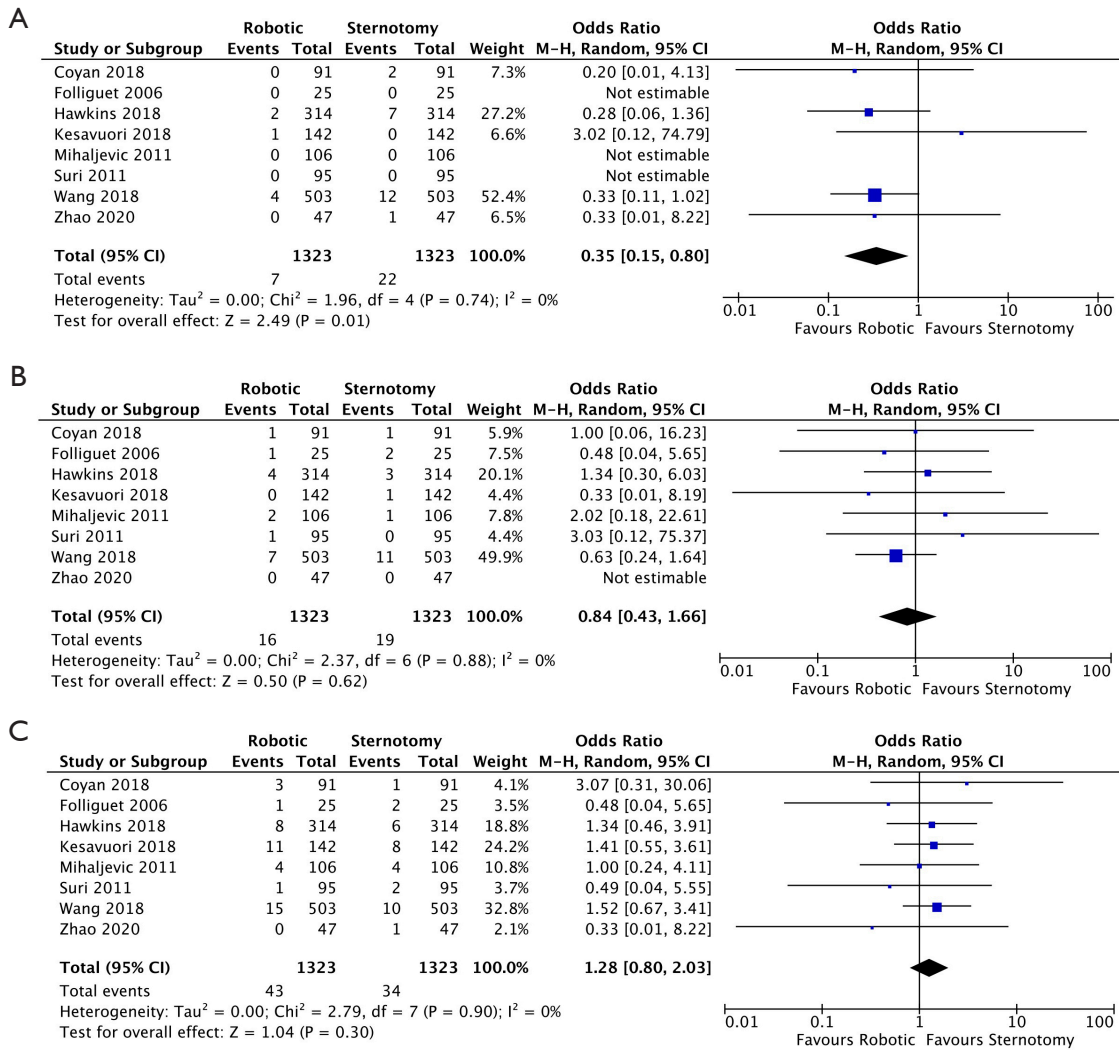

**Figure S1** Forrest plot of OR of matched cohort studies for all-cause mortality (A), CVA (B), and re-operation for bleeding (C) for robotic versus conventional sternotomy mitral valve surgery. OR, odds ratio; CI, confidence interval; CVA, cerebrovascular accidents; M-H, Mantel-Haenszel test.

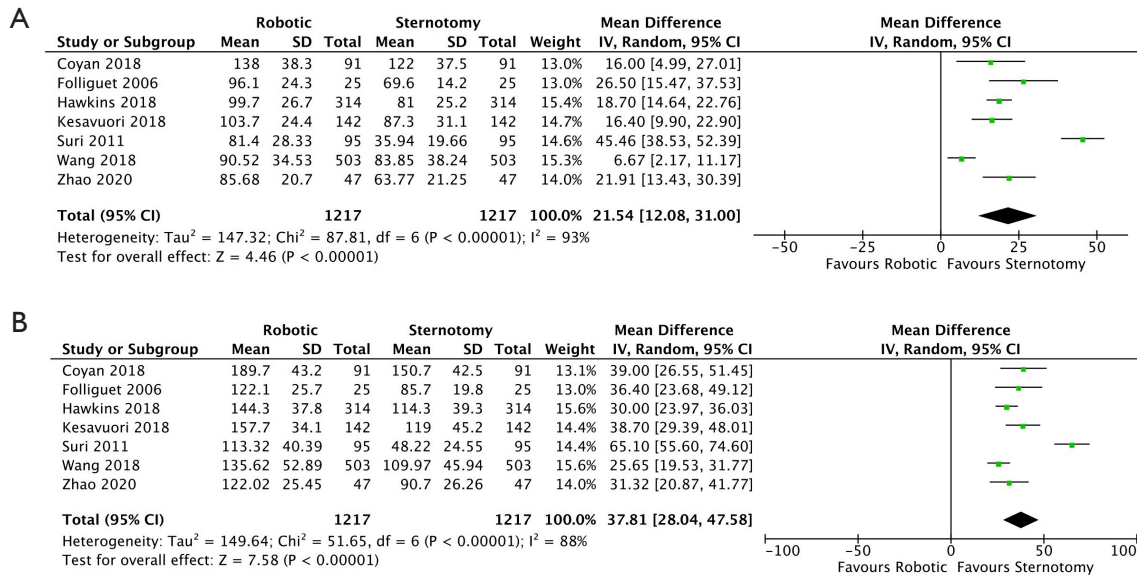

**Figure S2** Forrest plot of MD of matched cohort studies for cross clamp (A), and CPB times (B) for robotic versus conventional sternotomy mitral valve surgery. MD, mean difference; CPB, cardiopulmonary bypass; CI, confidence interval.

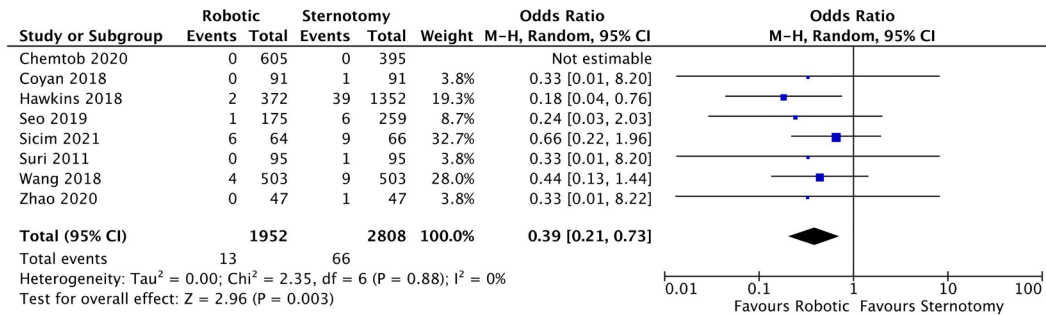

**Figure S3** Forrest plot of OR for post-operative renal insufficiency for robotic versus conventional sternotomy mitral valve surgery. OR, odds ratio; CI, confidence interval; M-H, Mantel-Haenszel test.

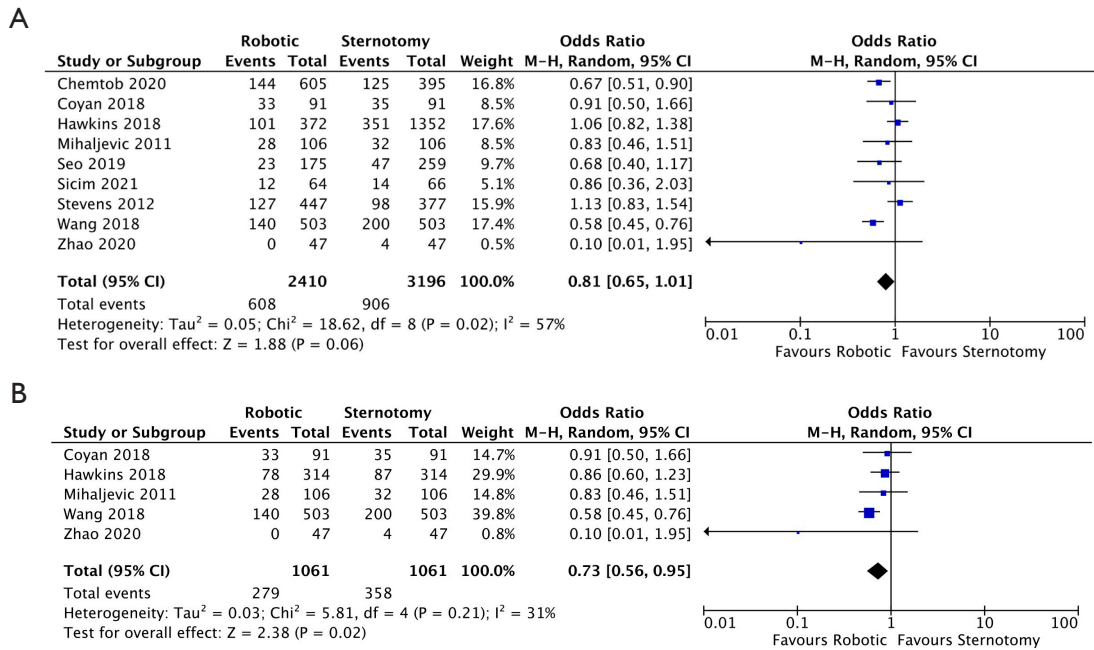

**Figure S4** Forrest plot of OR for POAF in all studies (A) and POAF in matched patient cohorts (B) for robotic versus conventional sternotomy mitral valve surgery. POAF, post-operative atrial fibrillation; OR, odds ratio; CI, confidence interval; M-H, Mantel-Haenszel test.

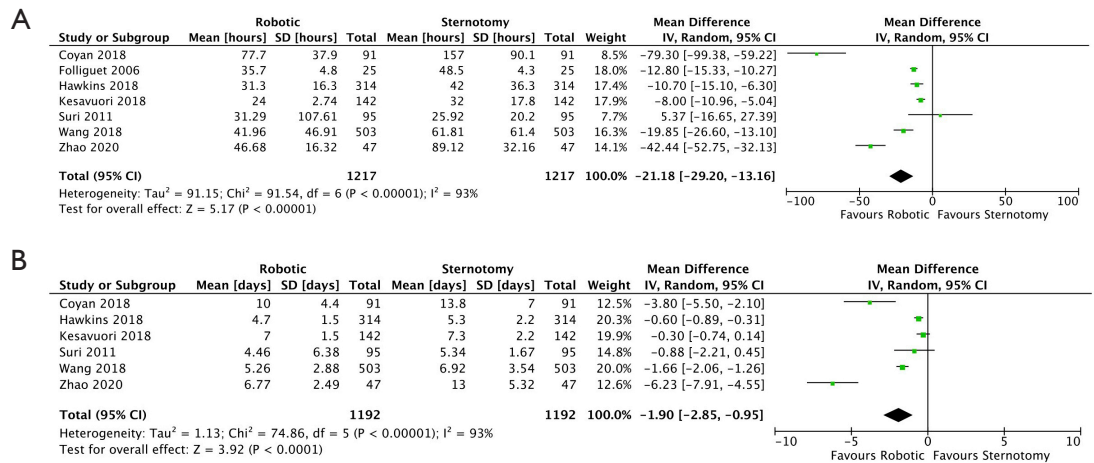

**Figure S5** Forrest plot of MD of matched cohort studies for (A) intensive care unit stay (hours), and (B) length of hospital stay (days) for robotic versus conventional sternotomy mitral valve surgery. MD, mean difference; CI, confidence interval.

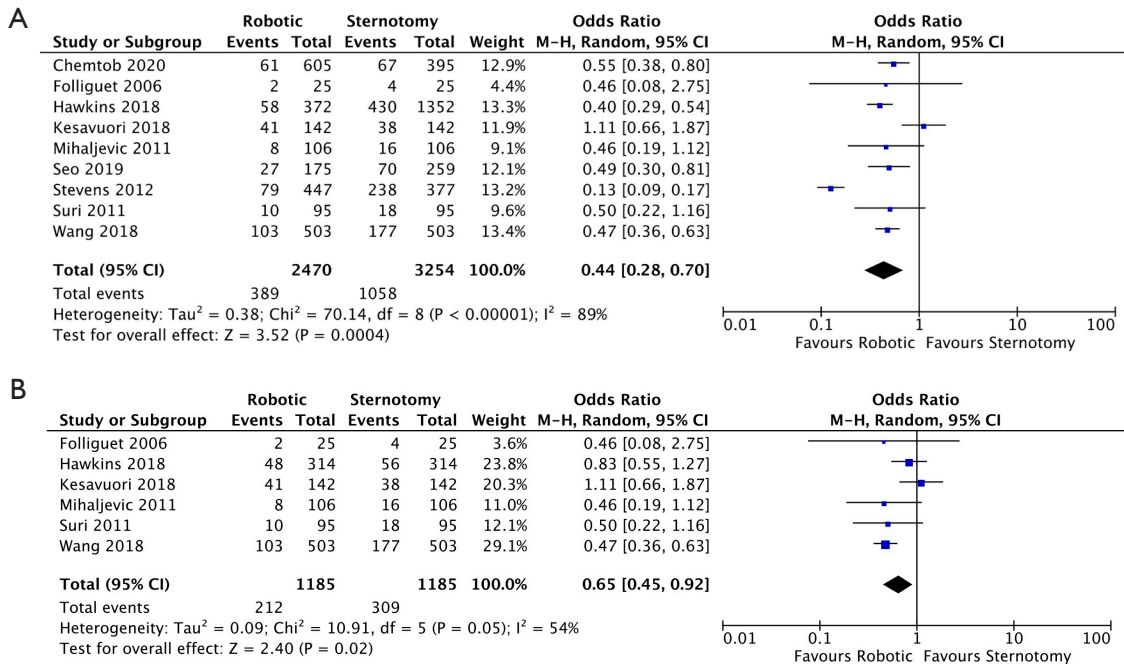

**Figure S6** Forrest plot of OR for RBC transfusion in all studies (A) and RBC transfusion in matched patient cohorts (B) for robotic versus conventional sternotomy mitral valve surgery. RBC, red blood cell; OR, odds ratio; CI, confidence interval; M-H, Mantel-Haenszel test.

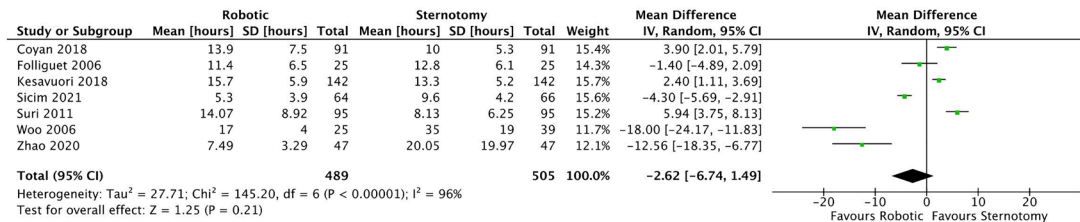

**Figure S7** Forrest plot of MD for ventilation time (hours) for robotic versus conventional sternotomy mitral valve surgery. MD, mean difference; CI, confidence interval.

**Table S4** Echocardiography results post-operatively

| Primary author   | Approach   | In-hospital/early follow-up |           |          |              |            | Latest follow-up |           |          |              |            |
|------------------|------------|-----------------------------|-----------|----------|--------------|------------|------------------|-----------|----------|--------------|------------|
|                  |            | None (%)                    | Trace (%) | Mild (%) | Moderate (%) | Severe (%) | None (%)         | Trace (%) | Mild (%) | Moderate (%) | Severe (%) |
| Chemtob, 2020    | Sternotomy | 92.9                        | 7.1       | 0.0      | (0.0         | NR         | NR               | NR        | NR       | NR           | NR         |
|                  | Robotic    | 86.3                        | 13.6      | 0.1      | 0.0          | NR         | NR               | NR        | NR       | NR           | NR         |
| Coyan, 2018      | Sternotomy | 100.0                       | 0.0       | 0.0      | 0.0          | NR         | NR               | NR        | NR       | NR           | NR         |
|                  | Robotic    | 100.0                       | 0.0       | 0.0      | 0.0          | NR         | 91%*             | NR        | NR       | NR           | NR         |
| Folliguet, 2006  | Sternotomy | 92.0                        | 0.0       | 0.0      | 8.0          | 0.0        | NR               | NR        | NR       | NR           | NR         |
|                  | Robotic    | 92.0                        | 0.0       | 0.0      | 8.0          | 0.0        | NR               | NR        | NR       | NR           | NR         |
| Hawkins, 2018    | Sternotomy | NR                          | NR        | NR       | NR           | NR         | NR               | NR        | NR       | NR           | NR         |
|                  | Robotic    | NR                          | NR        | NR       | NR           | NR         | NR               | NR        | NR       | NR           | NR         |
| Kam, 2010        | Sternotomy | 82.1                        | 17.9      | 0.0      | 0.0          | 0.0        | NR               | NR        | NR       | NR           | NR         |
|                  | Robotic    | 82.1                        | 14.2      | 2.8      | 0.9          | 0.0        | NR               | NR        | NR       | NR           | NR         |
| Kesävuori, 2018  | Sternotomy | NR                          | NR        | NR       | NR           | NR         | NR               | 84.7      | NR       | 5.1          | 0.8        |
|                  | Robotic    | NR                          | NR        | NR       | NR           | NR         | NR               | 86.3      | NR       | 7.6          | 1.5        |
| Mihaljevic, 2011 | Sternotomy | NR                          | 99.0      | NR       | 1.0          | NR         | NR               | NR        | NR       | NR           | NR         |
|                  | Robotic    | NR                          | 98.1      | NR       | 1.9          | NR         | NR               | NR        | NR       | NR           | NR         |
| Seo, 2019        | Sternotomy | 78.7                        | 15.7      | 4.7      | 0.9          | 58.2*      | 27.8*            | NR        | 12.7*    | 1.3*         | NR         |
|                  | Robotic    | 74.4                        | 19.8      | 5.2      | 0.6          | 39.5*      | 31.6*            | NR        | 21.1*    | 7.9*         | NR         |
| Sicim, 2021      | Sternotomy | NR                          | NR        | NR       | NR           | NR         | NR               | NR        | NR       | NR           | NR         |
|                  | Robotic    | NR                          | NR        | NR       | NR           | NR         | NR               | NR        | NR       | NR           | NR         |
| Stevens, 2012    | Sternotomy | NR                          | NR        | NR       | NR           | NR         | NR               | NR        | NR       | NR           | NR         |
|                  | Robotic    | NR                          | NR        | NR       | NR           | NR         | NR               | NR        | NR       | NR           | NR         |
| Suri, 2011       | Sternotomy | 82.1                        | 16.8      | 1.1      | 0.0          | NR         | NR               | NR        | NR       | NR           | NR         |
|                  | Robotic    | 82.1                        | 17.9      | 0.0      | 0.0          | NR         | NR               | NR        | NR       | NR           | NR         |
| Wang, 2018       | Sternotomy | 48.2                        | 35.4      | 9.8      | 4.3          | 1.2        | NR               | NR        | NR       | NR           | NR         |
|                  | Robotic    | 45.3                        | 38.2      | 14.7     | 1.2          | 0.6        | NR               | NR        | NR       | NR           | NR         |
| Woo, 2006        | Sternotomy | 82.6                        | 8.7       | 8.7      | 0.0          | 0.0        | NR               | NR        | NR       | NR           | NR         |
|                  | Robotic    | 82.4                        | 0.0       | 17.6     | 0.0          | 0.0        | NR               | NR        | NR       | NR           | NR         |
| Zhao, 2020       | Sternotomy | NR                          | NR        | NR       | NR           | NR         | NR               | NR        | NR       | NR           | NR         |
|                  | Robotic    | NR                          | NR        | NR       | NR           | NR         | NR               | NR        | NR       | NR           | NR         |

\*, one year follow-up data. NR, not reported.
